# Supplementary material for: Deriving a dataset for agriculturally relevant soils from the Soil Landscapes of Canada (SLC) database for use in Soil and Water Assessment Tool (SWAT) simulations
Source: Copernicus journal article supplement (doi:10.5194/essd-10-1673-2018), 2018-09-13
Supplement: Supplementary file 1 [file essd-10-1673-2018-supplement.pdf]

Supplement of Earth Syst. Sci. Data, 10, 1673–1686, 2018  
<https://doi.org/10.5194/essd-10-1673-2018-supplement>  
© Author(s) 2018. This work is distributed under  
the Creative Commons Attribution 4.0 License.

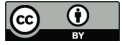

Open Access  
Earth System  
Science  
Data

*Supplement of*

## **Deriving a dataset for agriculturally relevant soils from the Soil Landscapes of Canada (SLC) database for use in Soil and Water Assessment Tool (SWAT) simulations**

**Marcos R. C. Cordeiro et al.**

*Correspondence to:* Tim McAllister ([tim.mcallister@agr.gc.ca](mailto:tim.mcallister@agr.gc.ca))

The copyright of individual parts of the supplement might differ from the CC BY 4.0 License.

Table S1. Criteria for assignment of hydrologic soil group [Adapted from USDA-NRCS (1993)]. Acronyms:  $K_{sat}$  = saturated hydraulic conductivity; HSG = hydrologic soil groups.

| Depth to water impermeable layer <sup>1</sup> | Depth to high water table <sup>2</sup>                             | $K_{sat}$ of least transmissive layer in depth range                | $K_{sat}$ depth range       | HSG <sup>3</sup> |
|-----------------------------------------------|--------------------------------------------------------------------|---------------------------------------------------------------------|-----------------------------|------------------|
| <50 cm<br>[<20 in]                            | –                                                                  | –                                                                   | –                           | D                |
| 50 to 100 cm<br>[20 to 40 in]                 | <60 cm<br>[<24 in]                                                 | >40.0 $\mu\text{m/s}$<br>(>5.67 in/h)                               | 0 to 60 cm<br>[0 to 24 in]  | A/D              |
|                                               |                                                                    | >10.0 to $\leq$ 40.0 $\mu\text{m/s}$<br>(>1.42 to $\leq$ 5.67 in/h) | 0 to 60 cm<br>[0 to 24 in]  | B/D              |
|                                               |                                                                    | >1.0 to $\leq$ 10.0 $\mu\text{m/s}$<br>(>0.14 to $\leq$ 1.42 in/h)  | 0 to 60 cm<br>[0 to 24 in]  | C/D              |
|                                               |                                                                    | $\leq$ 1.0 $\mu\text{m/s}$<br>( $\leq$ 0.14 in/h)                   | 0 to 60 cm<br>[0 to 24 in]  | D                |
|                                               | $\geq$ 60 cm<br>[ $\geq$ 24 in]                                    | >40.0 $\mu\text{m/s}$<br>(>5.67 in/h)                               | 0 to 50 cm<br>[0 to 20 in]  | A                |
|                                               |                                                                    | >10.0 to $\leq$ 40.0 $\mu\text{m/s}$<br>(>1.42 to $\leq$ 5.67 in/h) | 0 to 50 cm<br>[0 to 20 in]  | B                |
|                                               |                                                                    | >1.0 to $\leq$ 10.0 $\mu\text{m/s}$<br>(>0.14 to $\leq$ 1.42 in/h)  | 0 to 50 cm<br>[0 to 20 in]  | C                |
|                                               |                                                                    | $\leq$ 1.0 $\mu\text{m/s}$<br>( $\leq$ 0.14 in/h)                   | 0 to 50 cm<br>[0 to 20 in]  | D                |
| >100 cm<br>[>40 in]                           | <60 cm<br>[<24 in]                                                 | >10.0 $\mu\text{m/s}$<br>(>1.42 in/h)                               | 0 to 100 cm<br>[0 to 40 in] | A/D              |
|                                               |                                                                    | >4.0 to $\leq$ 10.0 $\mu\text{m/s}$<br>(>0.57 to $\leq$ 1.42 in/h)  | 0 to 100 cm<br>[0 to 40 in] | B/D              |
|                                               |                                                                    | >0.40 to $\leq$ 4.0 $\mu\text{m/s}$<br>(>0.06 to $\leq$ 0.57 in/h)  | 0 to 100 cm<br>[0 to 40 in] | C/D              |
|                                               |                                                                    | $\leq$ 0.40 $\mu\text{m/s}$<br>( $\leq$ 0.06 in/h)                  | 0 to 100 cm<br>[0 to 40 in] | D                |
|                                               | 60 to 100 cm<br>[24 to 40 in]                                      | >40.0 $\mu\text{m/s}$<br>(>5.67 in/h)                               | 0 to 50 cm<br>[0 to 20 in]  | A                |
|                                               |                                                                    | >10.0 to $\leq$ 40.0 $\mu\text{m/s}$<br>(>1.42 to $\leq$ 5.67 in/h) | 0 to 50 cm<br>[0 to 20 in]  | B                |
|                                               |                                                                    | >1.0 to $\leq$ 10.0 $\mu\text{m/s}$<br>(>0.14 to $\leq$ 1.42 in/h)  | 0 to 50 cm<br>[0 to 20 in]  | C                |
|                                               |                                                                    | $\leq$ 1.0 $\mu\text{m/s}$<br>( $\leq$ 0.14 in/h)                   | 0 to 50 cm<br>[0 to 20 in]  | D                |
| >100 cm<br>[>40 in]                           | >10.0 $\mu\text{m/s}$<br>(>1.42 in/h)                              | 0 to 100 cm<br>[0 to 40 in]                                         | A                           |                  |
|                                               | >4.0 to $\leq$ 10.0 $\mu\text{m/s}$<br>(>0.57 to $\leq$ 1.42 in/h) | 0 to 100 cm<br>[0 to 40 in]                                         | B                           |                  |
|                                               | >0.40 to $\leq$ 4.0 $\mu\text{m/s}$<br>(>0.06 to $\leq$ 0.57 in/h) | 0 to 100 cm<br>[0 to 40 in]                                         | C                           |                  |
|                                               | $\leq$ 0.40 $\mu\text{m/s}$<br>( $\leq$ 0.06 in/h)                 | 0 to 100 cm<br>[0 to 40 in]                                         | D                           |                  |

<sup>1</sup>An impermeable layer has a  $K_{sat}$  less than 0.01  $\mu\text{m/s}$  [0.0014 in/h] or a component restriction of fragipan; duripan; petrocalcic; orstein; petrogypsic; cemented horizon; densic material; placic; bedrock, paralithic; bedrock, lithic; bedrock, densic; or permafrost.

<sup>2</sup>High water table during any month during the year.

<sup>3</sup>Dual HSG classes are applied only for wet soils (water table less than 60 cm [24 in]). If these soils can be drained, a less restrictive HSG can be assigned, depending on the  $K_{sat}$ .

#### References

USDA-NRCS: Hydrologic Soil Groups, in: National Engineering Handbook, Part 630, U.S. Department of Agriculture, Soil Conservation Service, 7.1-7.5, 1993.
